# Supplementary material for: Supramolecular polymeric vesicles formed by p-sulfonatocalix[4]arene and chitosan with multistimuli responses
Source: Royal Society of Chemistry journal article supplement (doi:10.1039/c4sm02170c), 2014-11-03
Supplement: c4sm02170c1.pdf [file c4sm02170c1.pdf]

Supporting Information  
for  
Supramolecular Polymeric Vesicles Formed  
by *p*-Sulfonatocalix[4]arene and Chitosan with  
Multistimuli Responses

*Shu Peng,<sup>a</sup> Kui Wang,<sup>a,b</sup> Dong-Sheng Guo<sup>a</sup> and Yu Liu<sup>\*a</sup>*

<sup>a</sup>Department of Chemistry, State Key Laboratory of Elemento-Organic Chemistry,  
Nankai University, Collaborative Innovation Center of Chemical Science and  
Engineering (Tianjin), Tianjin 300071, P.R. China

<sup>b</sup>Tianjin Key Laboratory of Structure and Performance for Functional Molecules, Key  
Laboratory of Inorganic-Organic Hybrid Functional Material Chemistry, Ministry of  
Education, College of Chemistry, Tianjin Normal University, Tianjin 300387, P. R.

China

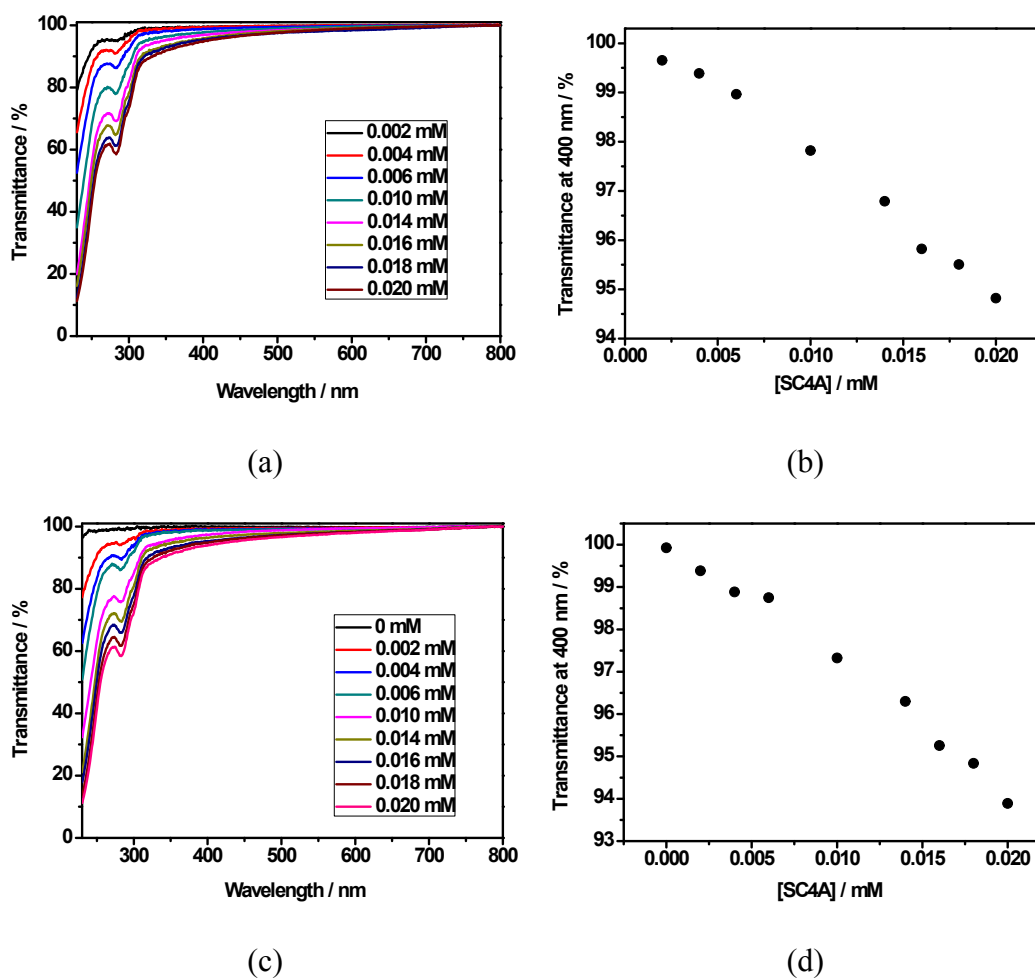

**Figure S1.** (a) Optical transmittance of 30  $\mu\text{g/mL}$  chitosan-0.6 solutions with SC4A of different concentrations at 25  $^{\circ}\text{C}$ . (b) Dependence of the optical transmittance at 400 nm on SC4A concentration in the presence of 30  $\mu\text{g/mL}$  chitosan-0.6. (c) Optical transmittance of 30  $\mu\text{g/mL}$  chitosan-0.95 solutions with SC4A of different concentrations at 25  $^{\circ}\text{C}$ . (d) Dependence of the optical transmittance at 400 nm on SC4A concentration in the presence of 30  $\mu\text{g/mL}$  chitosan-0.95.

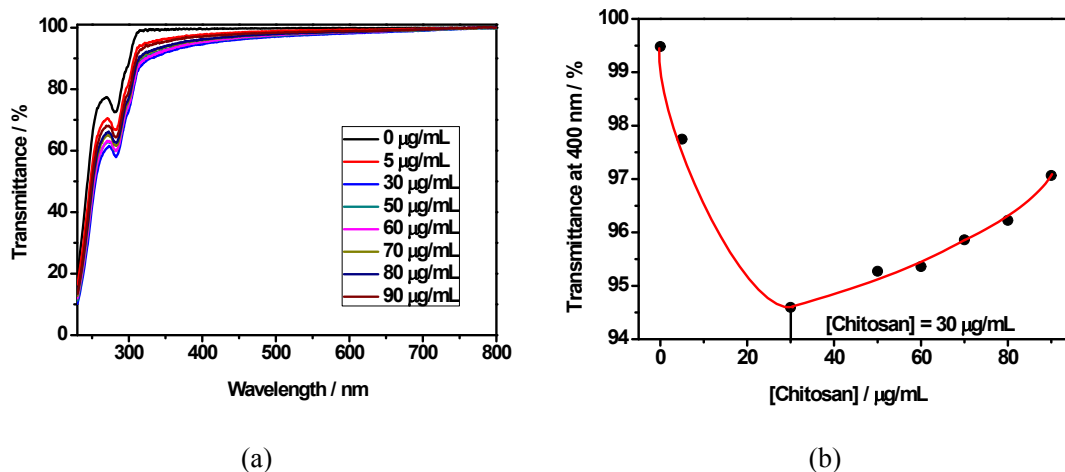

**Figure S2.** (a) Optical transmittance of SC4A (0.02 mM) by increasing the concentration of chitosan-0.6 from 0 µg/mL to 90 µg/mL at 25 °C in aqueous solution at pH 5.3. (b) Dependence of the optical transmittance at 400 nm on the concentration of chitosan-0.6 with a fixed SC4A concentration of 0.02 mM.

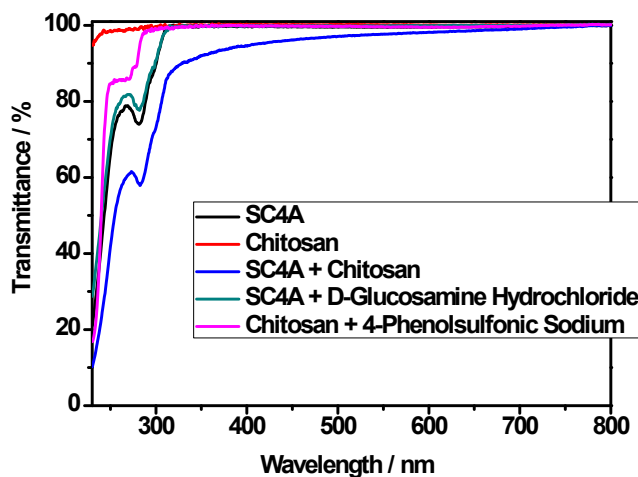

**Figure S3.** Optical transmittances of SC4A, chitosan, SC4A+chitosan, SC4A+D-glucosamine hydrochloride, and chitosan+4-phenolsulfonic sodium at 25 °C in aqueous solution at pH 5.3. [SC4A] = 0.02 mM, [chitosan-0.6] = 30 µg/mL, [4-phenolsulfonic sodium] = 0.02 mM.

phenolsulfonic sodium] = 0.08 mM, and [D-glucosamine hydrochloride] = 22  $\mu\text{g}/\text{mL}$ .

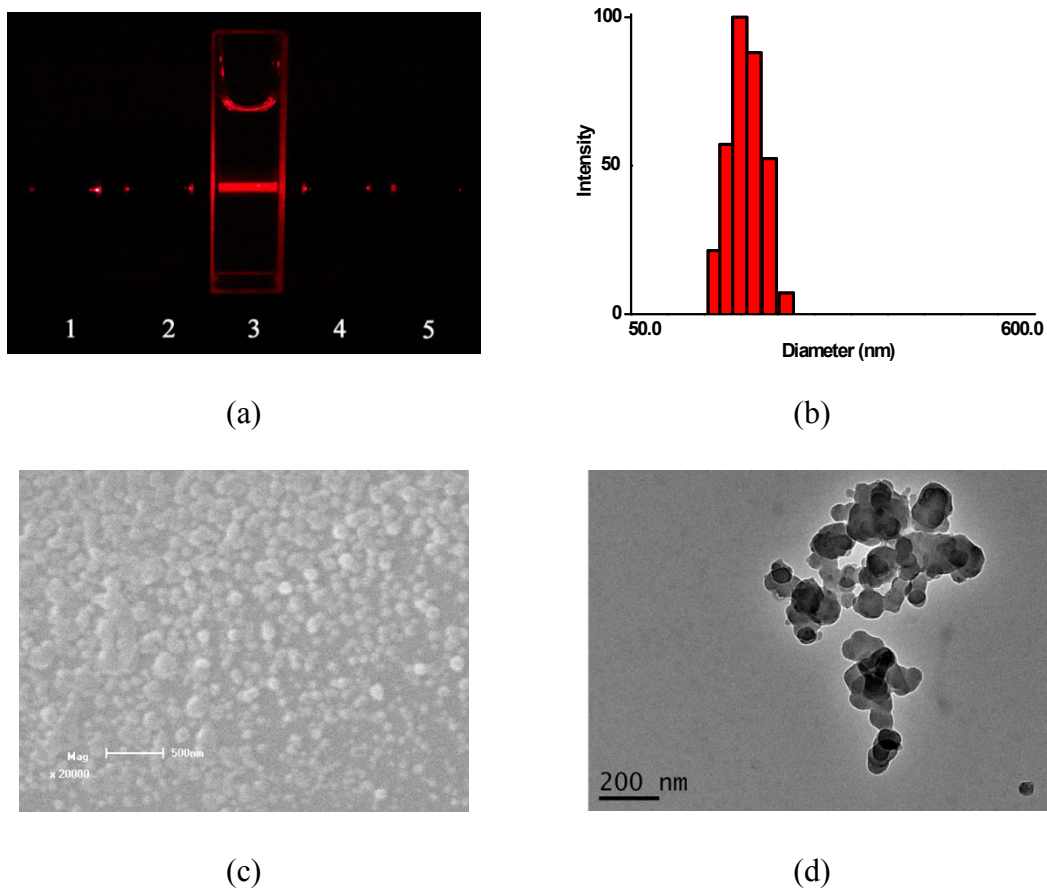

**Figure S4.** (a) Tyndall effect of free SC4A (1), free chitosan (2), SC4A+chitosan (3), SC4A+D-glucosamine hydrochloride (4), and chitosan+4-phenolsulfonic sodium (5). (b) DLS data of the SC4A+chitisan assembly. (c) SEM, and (d) high-resolution TEM images of the SC4A+chitisan assembly. [SC4A] = 0.02 mM, [chitosan-0.6] = 30  $\mu\text{g}/\text{mL}$ , [4-phenolsulfonic sodium] = 0.08 mM, and [D-glucosamine hydrochloride] = 22  $\mu\text{g}/\text{mL}$ .

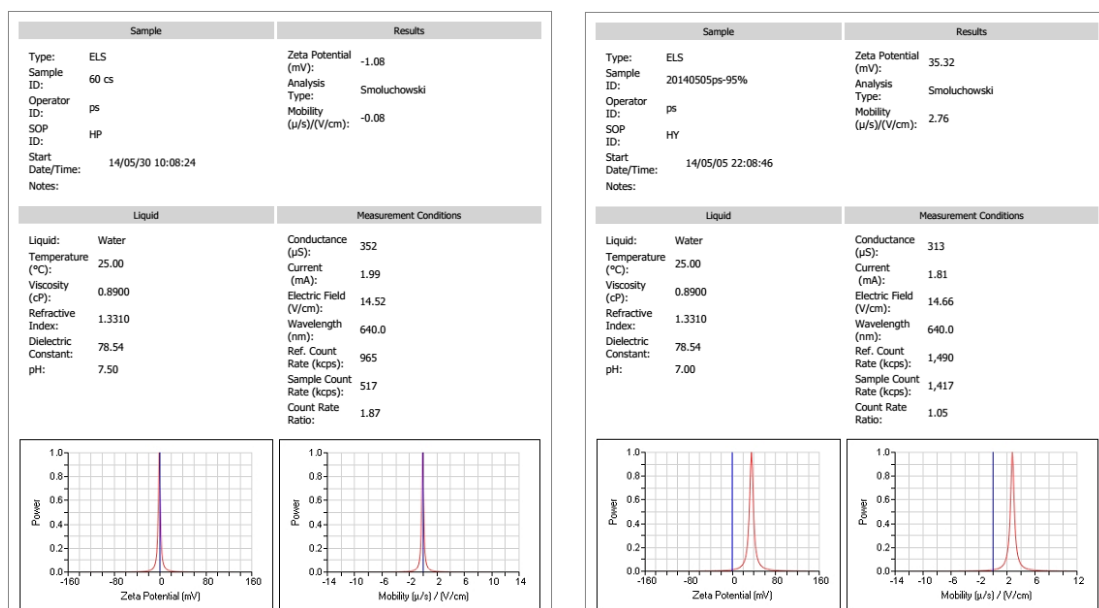

(a)

(b)

**Figure S5.** Zeta potential measurement of the SC4A+chitosan assembly at 25 °C in aqueous solution at pH 5.3. (a): [SC4A] = 0.02 mM, [chitosan-0.6] = 30  $\mu\text{g}/\text{mL}$ ; (b): [SC4A] = 0.02 mM, [chitosan-0.95] = 30  $\mu\text{g}/\text{mL}$ .

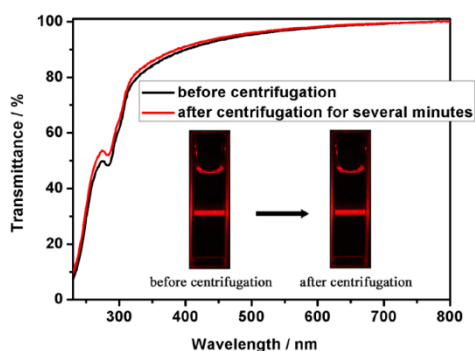

(a)

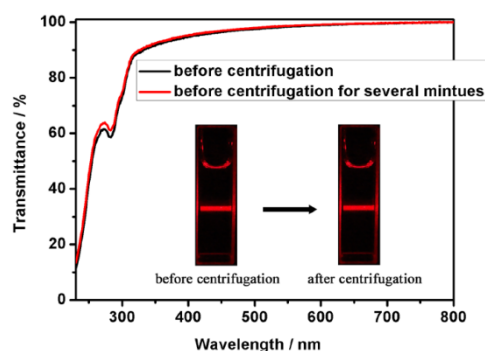

(b)

**Figure S6.** (a) Optical transmittance of SC4A+chitosan-0.95 assembly before and after centrifugation for several minutes at 2500 r/min in aqueous solution at pH 5.3. Inset: Tyndall effect of SC4A+chitosan-0.95 assembly before and after centrifugation. (b) Optical transmittance of SC4A+chitosan-0.6 assembly before and after centrifugation for several minutes at 2500 r/min in aqueous solution at pH 5.3. Inset: Tyndall effect of SC4A+chitosan-0.6 assembly before and after centrifugation. [SC4A] = 0.02 mM, [chitosan-0.95] = 30  $\mu\text{g/mL}$ , [chitosan-0.6] = 30  $\mu\text{g/mL}$ .

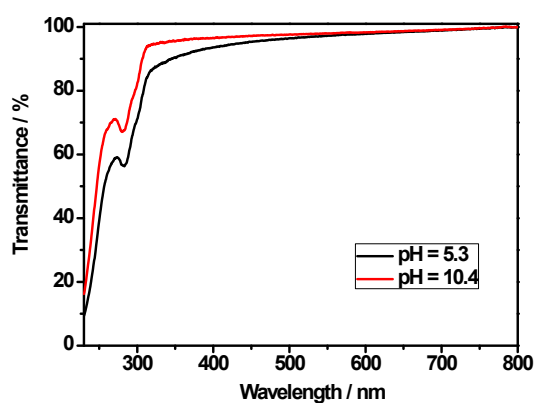

(a)

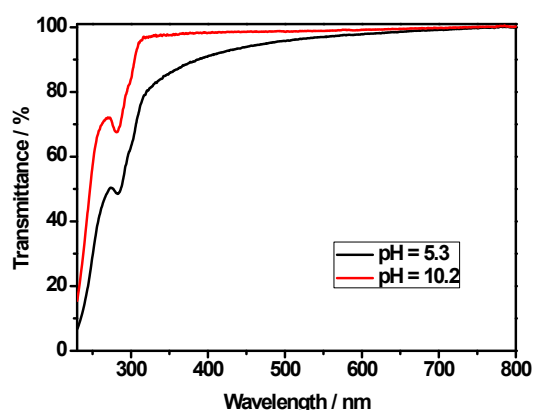

(b)

**Figure S7.** Optical transmittance of SC4A+chitosan solution under acidic and

alkaline conditions. (a): [SC4A] = 0.02 mM, [chitosan-0.6] = 30  $\mu\text{g/mL}$ ; (b): [SC4A] = 0.02 mM, [chitosan-0.95] = 30  $\mu\text{g/mL}$ .

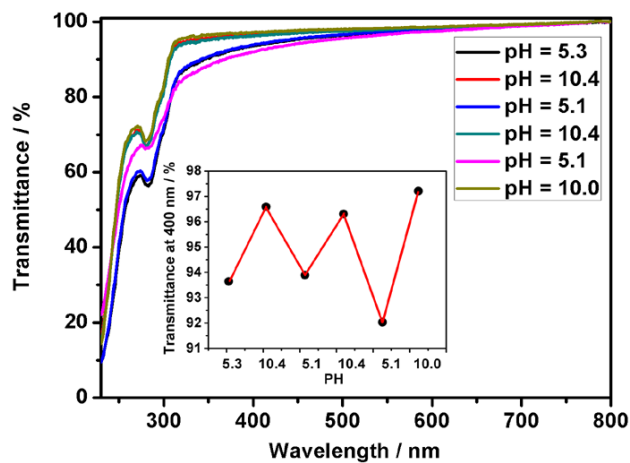

**Figure S8.** Optical transmittance of SC4A+chitosan-0.6 solution observed upon several cycles under acidic and alkaline conditions. Inset: the optical transmittance changes at 400 nm. [SC4A] = 0.02 mM, [chitosan-0.6] = 30  $\mu\text{g/mL}$ .

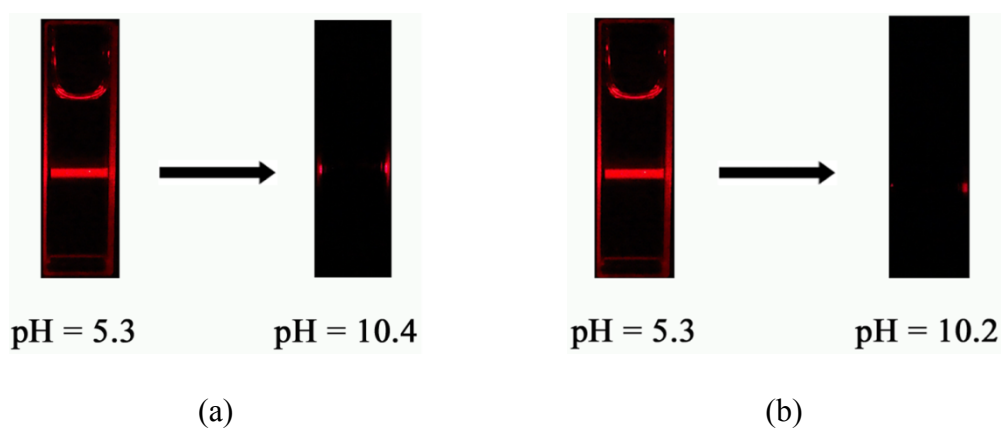

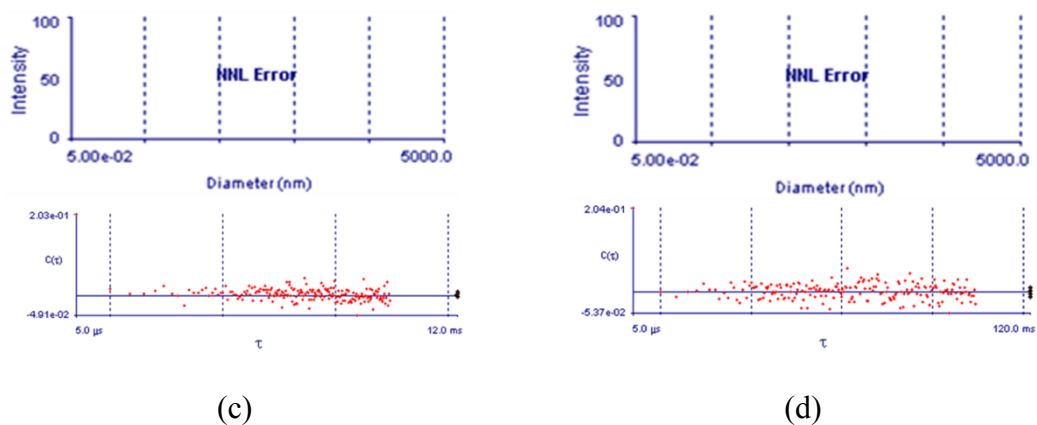

**Figure S9.** (a) Tyndall effect of SC4A+chitosan-0.6 solution under acidic and alkaline conditions. (b) Tyndall effect of SC4A+chitosan-0.95 solution under acidic and alkaline conditions. (c) DLS data of SC4A+chitosan-0.6 solution under alkaline condition. (d) DLS data of SC4A+chitosan-0.95 solution under alkaline condition. [SC4A] = 0.02 mM, [chitosan-0.6] = 30  $\mu\text{g/mL}$ , [chitosan-0.95] = 30  $\mu\text{g/mL}$ .

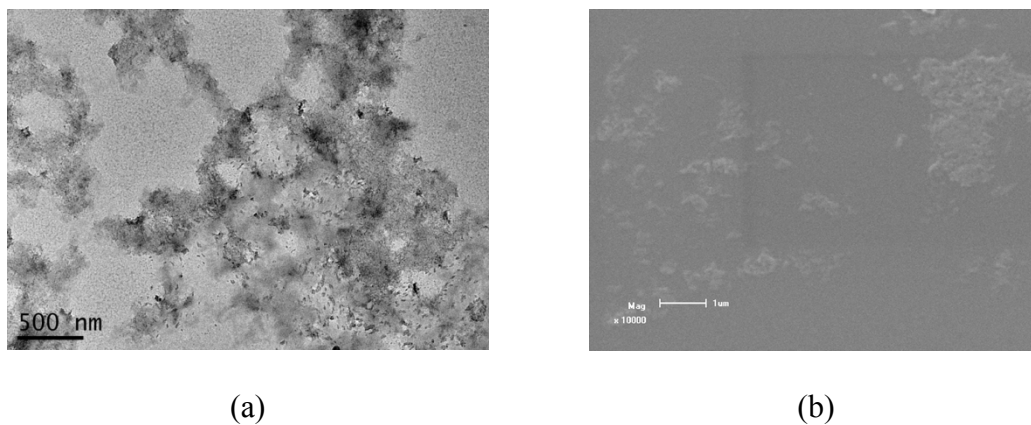

**Figure S10.** (a) High-resolution TEM, and (b) SEM images of SC4A+chitosan-0.6 solution under alkaline condition. [SC4A] = 0.02 mM, [chitosan-0.6] = 30  $\mu\text{g/mL}$ . The scale bar of SEM image is 1  $\mu\text{m}$ .



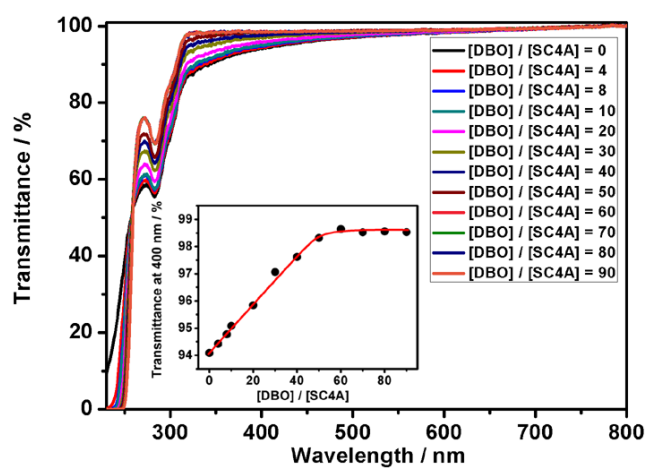

**Figure S11.** Optical transmittance of SC4A+chitosan-0.6 solution at different concentrations of DBO. Inset: dependence of the optical transmittance at 400 nm on DBO concentration with a fixed SC4A concentration of 0.02 mM. [chitosan-0.6] = 30  $\mu\text{g/mL}$ .

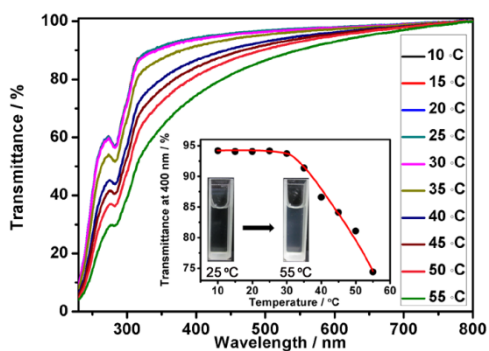

(a)

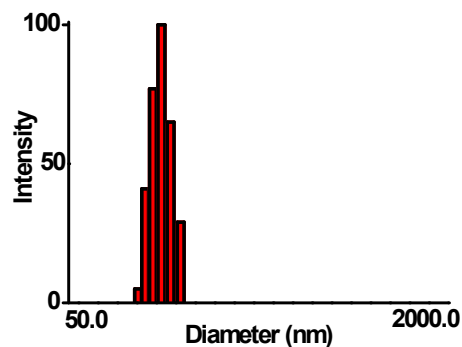

(b)

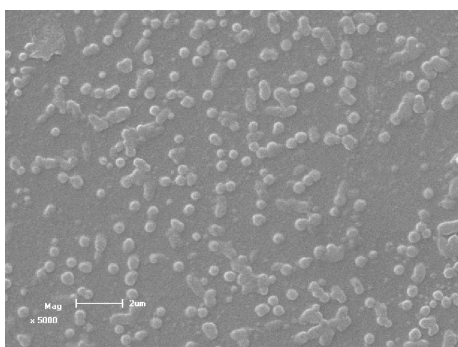

(c)

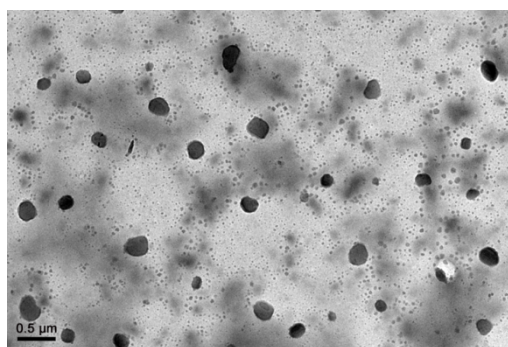

(d)

**Figure. S12** (a) Optical transmittance of SC4A+chitosan-0.6 assembly with temperature ascending from 10 to 55 °C. Inset: dependence of the optical transmittance at 400 nm on temperature, and the corresponding turbidity photos at 25 and 55 °C. DLS data (b), SEM (c), and high-resolution TEM (d) images of SC4A+chitosan assembly at 55 °C. [SC4A] = 0.02 mM, [chitosan-0.6] = 30 μg/mL.

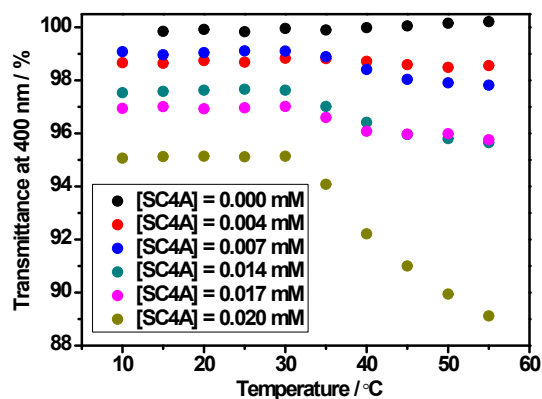

**Figure S13.** Dependence of the optical transmittance at 400 nm on temperature in the presence of different concentrations of SC4A with a fixed chitosan-0.6 concentration of 30  $\mu\text{g/mL}$ .

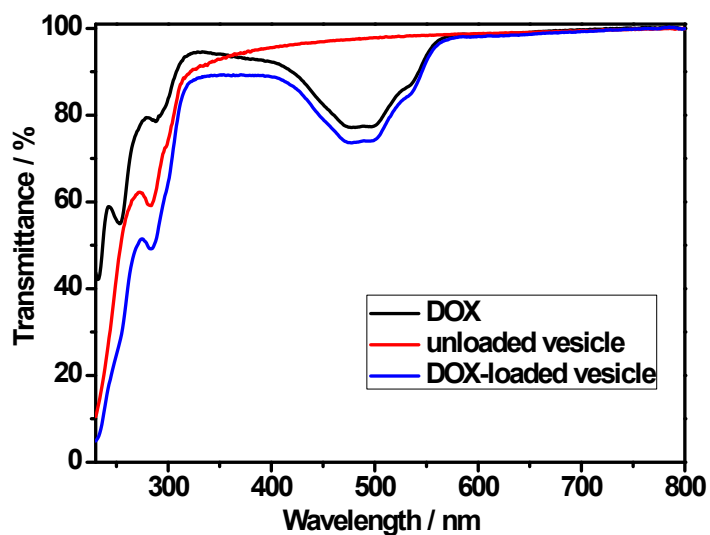

**Figure S14.** Optical transmittances of DOX, unloaded vesicles, DOX-loaded vesicle at 25  $^{\circ}\text{C}$  in aqueous solution at pH 5.3.  $[\text{SC4A}] = 0.02 \text{ mM}$ ,  $[\text{chitosan-0.6}] = 30 \mu\text{g/mL}$ .

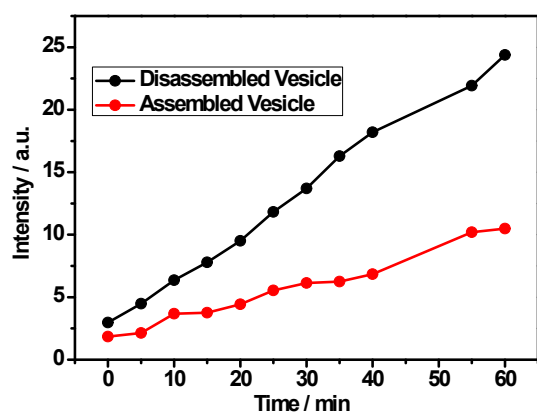

(a)

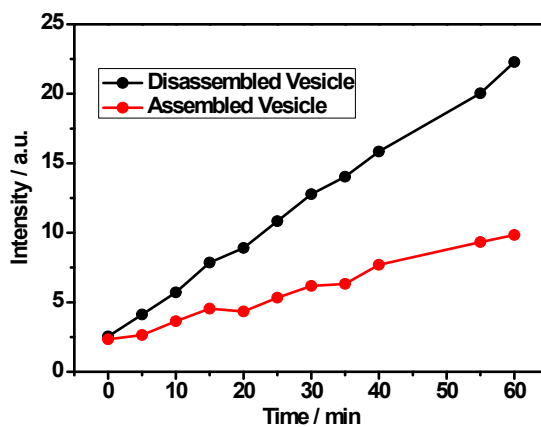

(b)

**Figure S15.** (a) Dependence of the fluorescence intensity of DOX outside of dialysis bag at 600 nm on time.  $[SC4A] = 0.02$  mM,  $[chitosan-0.95] = 30$   $\mu\text{g/mL}$ . (b) Dependence of the fluorescence intensity of DOX outside of dialysis bag at 600 nm on time.  $[SC4A] = 0.02$  mM,  $[chitosan-0.6] = 30$   $\mu\text{g/mL}$ .  $\lambda_{\text{ex}} = 500.0$  nm, band width (ex and em): 10.0 nm.
